# Supplementary material
Source: Springer Nature journal article supplement (https://www.springermedizin.de/resource/supplementary/12886_2010_210_MOESM6_ESM.pdf/9473534)

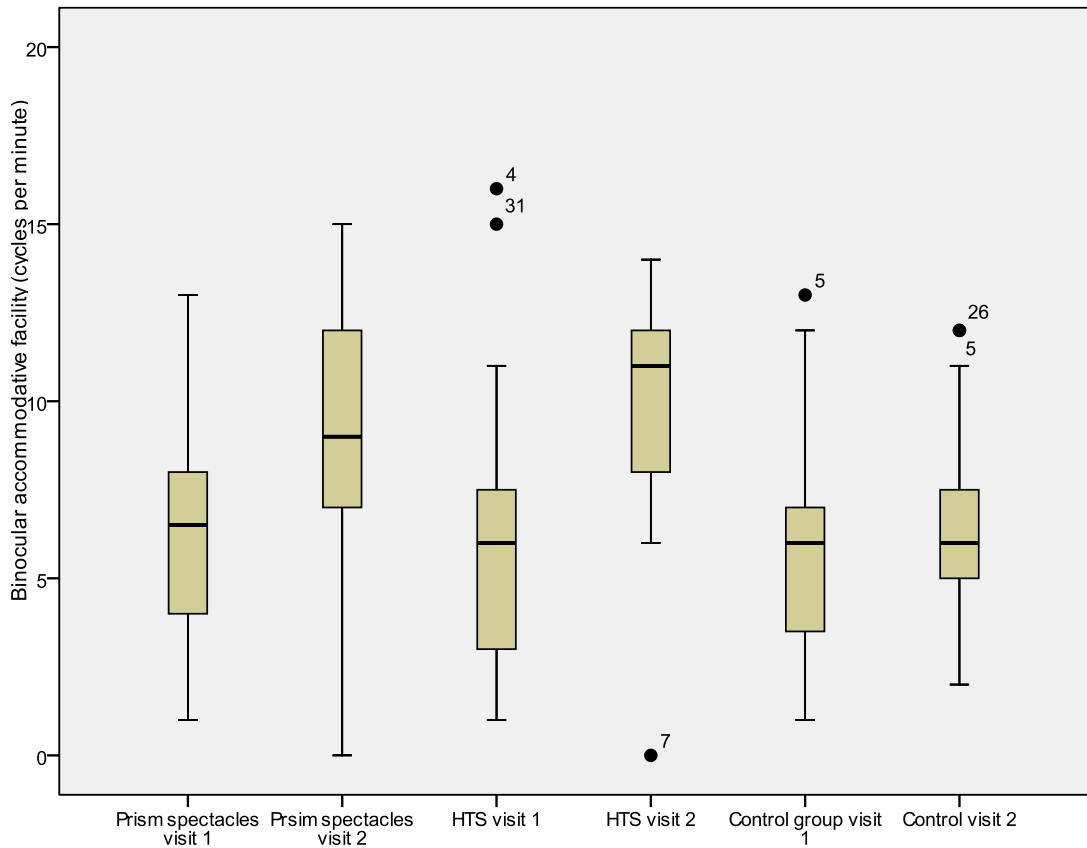

Supplement: MOESM6 [file 9473534]
